# Supplementary material for: Diaminoquinazoline MMV675968 from Pathogen Box inhibits Acinetobacter baumannii growth through targeting of dihydrofolate reductase
Source: PubMed Central journal article supplement (PMC6821926; doi:10.1038/s41598-019-52176-8), 2019-10-30
Supplement: 41598_2019_52176_MOESM1_ESM.pdf [file 41598_2019_52176_MOESM1_ESM.pdf]

**Diaminoquinazoline MMV675968 from Pathogen Box inhibits *Acinetobacter baumannii* growth through targeting of dihydrofolate reductase**

Warangkhanas Songsunthong, Suganya Yongkiettrakul, Louise E. Bohan, Eric S. Nicholson, Sunisa Prasopporn, Pimchai Chaiyen, Ubolsree Leartsakulpanich

**Supplementary Information**

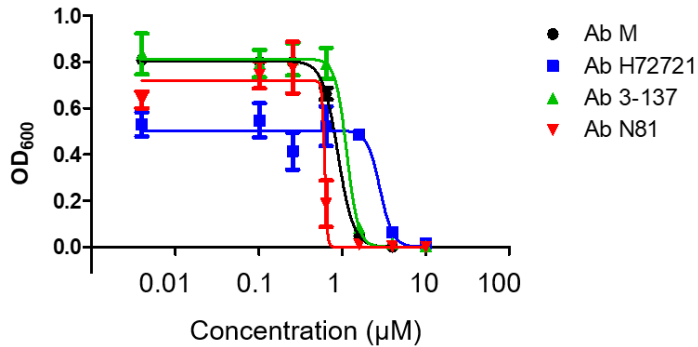

**Fig. S1. Growth inhibitory curve of four *A. baumannii* strains by MMV675968.** Growth (OD<sub>600</sub>) of four *A. baumannii* strains upon treatment with various concentrations of MMV67568.

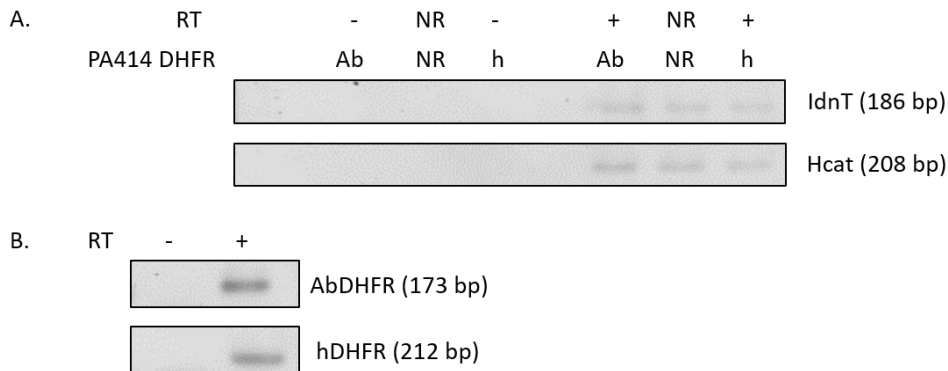

**Fig. S2. Gene expression of *AbDHFR* and *hDHFR* in *E. coli* PA414 surrogate.** A) RT-PCR of reference genes – *idnT* and *hcaT*<sup>1</sup>. B) RT-PCR of *AbDHFR* and *hDHFR*. Images were crop from different gels and arranged together. RT - reverse transcriptase. DHFR – dihydrofolate

reductase. Ab – *A. baumannii*. h – human. bp – base pairs. NR – this lane is not related to this study.

```

Red      - folate binding site
Blue     - NADPH binding site

AbN81DHFR      MAWQNVEVVHVVAMDKNHCIGKGNALPWHISADLKHFKKEITQGGVVIMGRKTLESMSGRAL      60
AbMDHFR        MAWQNVEVVHVVAMDKNHCIGKGNALPWHISADLKHFKKEITQGGVVIMGRKTLESMSGRAL      60
AbH72721DHFR  MAWQNVEVVHVVAMDKNHCIGKGNALPWHISADLKHFKKEITQGGVVIMGRKTLESMSGRAL      60
Ab3-137DHFR    MAWQNVEVVHVVAMDKNHCIGKGNALPWHISADLKHFKKEITQGGVVIMGRKTLESMSGRAL      60
*****

AbN81DHFR      PNRVNWVITRDINWHFDGVKIAYSIEDALNAALEDAKNTKQALFIIGGGEIFKQTLZIA      120
AbMDHFR        PNRVNWVITRDINWHFDGVKIAYSIEDALNAALEDAKNTKQALFIIGGGEIFKQTLZIA      120
AbH72721DHFR  PNRVNWVITRDINWHFDGVKIAYSIEDALNAALEDAKNTKQALFIIGGGEIFKQTLZIA      120
Ab3-137DHFR    PNRVNWVITRDINWHFDGVKIAYSIEDALNAALEDAKNTKQALFIIGGGEIFKQTLZIA      120
*****

AbN81DHFR      DRLELTHVDLDVQGDHYPTIPSEFHKTASEQQVDEKSGTSFEFATYKK      169
AbMDHFR        DRLELTHVDLDVQGDHYPTIPSEFHKTASEQQVDEKSGTSFEFATYKK      169
AbH72721DHFR  DRLELTHVDLDVQGDHYPTIPSEFHKTASEQQVDEKSGTSFEFATYKK      169
Ab3-137DHFR    DRLELTHVDLDVQGDHYPTIPSEFHKTASEQQVDEKSGTSFEFATYKK      169
*****

```

**Fig. S3. Amino acid sequence alignment of DHFR from four *A. baumannii* strains.** The *dhfr* gene sequences were amplified from the four *A. baumannii* strains and cloned into the pET15b plasmid. The resulting plasmids were subjected to Sanger sequencing. The DNA sequences were translated to protein sequences using ExPASy translate tool <sup>2</sup> and multiply-aligned using CLUSTAL Omega <sup>3</sup>. Residues predicted to bind to folate (red) or NADPH (blue) by NCBI BLAST and NCBI conserved domain <sup>4</sup> are shown.

## Materials and methods

### Determination of gene expression level in *E. coli* PA414 using RT-PCR.

Overnight cultures of *E. coli* PA414 containing a combination of pBAD33-EcTS and either pET15b-*AbDHFR* or pET15b-*hDHFR* were diluted to OD 0.1 into LB supplemented with 100 µg/ml ampicillin, 10 µg/ml chloramphenicol, and 0.2% arabinose, grown at 37 °C with shaking overnight. RNA was extracted from *E. coli* PA414 using RNeasy Plus Mini kit according to the manufacturer’s protocol (Qiagen, Dusseldorf, Germany), DnaseI (New England Biolabs, Ipswich, MA) treated, purified using phenol/chloroform/isoamyl alcohol precipitation, and precipitated using ethanol precipitation. Reverse transcription was performed to obtain cDNA using M-MuLV reverse transcriptase according to the manufacturer’s protocol (New England Biolabs, Ipswich, MA) using random hexamers as primers. PCR was performed using cDNA as template and primers specific to the following genes: *hcaT* (5'ggattggttaacgccagaa3' and 5'ccaatcatcaccagcatcag3'), *idnT* (5' tcccgtttaatggtactgg 3' and 5' acggcgtaatggctaacac 3'), *Abdhfr* (5'gcagaccgtcttgagctcac 3' and pET15b-specific primer 5' cttgttagcagccggatcc), and *hdhfr* (5'gccatgaatcaccaggcc 3' and pET15b-specific primer 5' cttgttagcagccggatcc). The *hcaT* and *idnT* genes were shown to be invariant during different growth phases of *E. coli*, thereby can be used as reference genes for expression study <sup>1</sup>.

## References

1. Zhou, K. *et al.* Novel reference genes for quantifying transcriptional responses of *Escherichia coli* to protein overexpression by quantitative PCR. *BMC Mol. Biol.* **12**, (2011).
2. Gasteiger, E. *et al.* ExPASy: The proteomics server for in-depth protein knowledge and analysis. *Nucleic Acids Res.* **31**, 3784–8 (2003).
3. Sievers, F. *et al.* Fast, scalable generation of high-quality protein multiple sequence alignments using Clustal Omega. *Mol. Syst. Biol.* **7**, 539 (2011).
4. Marchler-Bauer, A. *et al.* CDD: NCBI's conserved domain database. *Nucleic Acids Res.* **43**, D222–D226 (2015).
